# Supplementary material for: Facile fabrication of a magnetically assembled colloidal photonic crystal film via radical polymerization
Source: Royal Society of Chemistry journal article supplement (doi:10.1039/c5ra13900g), 2015-01-01
Supplement: c5ra13900g1.pdf [file c5ra13900g1.pdf]

## Supplementary Information

# Facile Fabrication of Magnetically Assembled Colloidal Photonic Crystal Film via Radical Polymerization

Aimei You, Yuhua Cao\*, Guangqun Cao

*The Key Laboratory of Food Colloids and Biotechnology, Ministry of Education, School of  
Chemical and Material Engineering, Jiangnan University, Wuxi 214122, P. R. China*

### Synthesis of Fe<sub>3</sub>O<sub>4</sub>@OA Magnetic Nanoparticles.

Fe<sub>3</sub>O<sub>4</sub>@OA magnetic nanoparticles were prepared by the classical chemical co-precipitation procedure. FeCl<sub>3</sub>·6H<sub>2</sub>O (4.05 g) and FeSO<sub>4</sub>·7H<sub>2</sub>O (2.78 g) were dissolved with water (100 mL) by vigorous stirring under N<sub>2</sub> gas protection. Once the solution was heated to 90°C, ammonium hydroxide (15 mL) and OA (0.67 g) were rapidly added in sequence. After stirring for 1h, Fe<sub>3</sub>O<sub>4</sub>@OA magnetic nanoparticles were obtained. Then the Fe<sub>3</sub>O<sub>4</sub>@OA nanoparticles were separated by means of magnetic aggregation with a magnet. Next, the nanoparticles were washed with water and ethanol, respectively, and dried under vacuum at 50°C overnight. The dried magnetic nanoparticles were dispersed well in chloroform or cyclohexane.

### Preparation of MCNPs by Three-step Miniemulsion Polymerization.

MCNPs were prepared by the three-step miniemulsion polymerization. In the first step, 0.5 g Fe<sub>3</sub>O<sub>4</sub>@OA were dispersed in 2.5 mL organic solvent, and added drop-wise into 40mL aqueous solution containing 0.05 g SDS under vigorous stirring

23 for pre-emulsification. After 30 min, the solution was sonicated in ice-water bath for  
24 30 s to get the miniemulsion A. In the second step, 0.1 g MMA and 1.2 g EGDMA  
25 were added into 40 mL aqueous solution containing 0.05 g SDS as in step 1 for pre-  
26 emulsification. Then the solution was sonicated in ice-water bath for 15 s to get the  
27 miniemulsion B. In the third step, a mixture of the magnetite miniemulsion A and the  
28 miniemulsion B was sonicated in ice-water bath for 30 s. After that, the miniemulsion  
29 was transferred into a three neck-bottomed flask, and heated to 70°C under an  
30 atmosphere of nitrogen. Finally, 10 mg KPS was added to initiate polymerization by  
31 stirring at 350 rpm. The polymerization time was 18 h.

32

### 33 **FT-IR characteristic of MCNPs.**

34 The functional groups of MCNPs were analyzed by FT-IR, shown in Figure S1.  
35 The peaks at 2925  $\text{cm}^{-1}$  and 1453  $\text{cm}^{-1}$  were characteristic peaks for C-H stretching  
36 and bending vibrations. The peak at 1732  $\text{cm}^{-1}$  was attributed to the stretching  
37 vibration of C=O in ester group in EGDMA and MMA. The peaks at 1162  $\text{cm}^{-1}$  was  
38 from stretching vibration of C-O-C in EGDMA. The peaks at 1260  $\text{cm}^{-1}$  might be  
39 characteristic peak of S=O stretching vibration resulted from the surfactant SDS and  
40 the KPS during polymerization. The peaks near 590  $\text{cm}^{-1}$  were characteristic peaks of  
41 Fe-O-Fe in magnetite. All these adsorption peaks confirmed the successful formation  
42 of magnetite @ poly(MMA-co-EGDMA) composite.

43

44

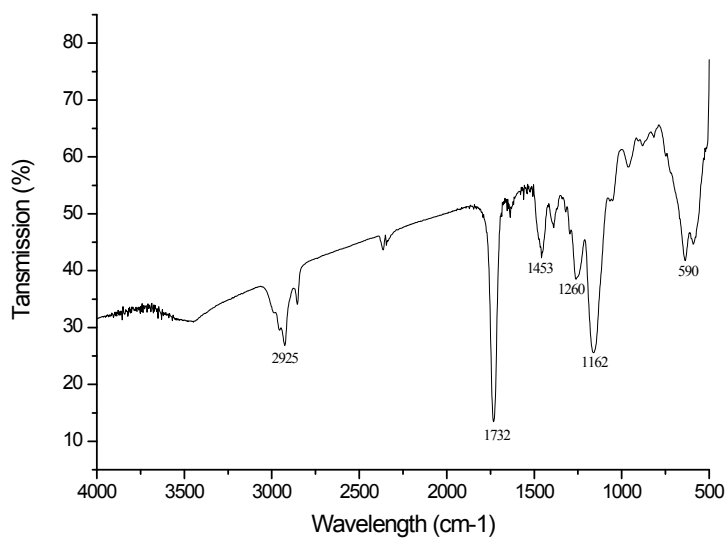

**Fig. S1** FT-IR spectrum of MCNPs

**Table S1** The influence of surfactant concentration on the particle size ( $D_h$ ), polydispersity indexes (PDI), and the content of magnetite

| Sample | SDS(mmol/L) | $D_h$ (nm) | PDI   | TGA (%) |
|--------|-------------|------------|-------|---------|
| MCNP-1 | 0.87        | 296        | 0.340 | 33.8    |
| MCNP-2 | 1.7         | 166        | 0.171 | 38.2    |
| MCNP-3 | 2.6         | 162        | 0.163 | 39.6    |
| MCNP-4 | 3.5         | 152        | 0.160 | 48.5    |
| MCNP-5 | 4.3         | 152        | 0.162 | 45.8    |
| MCNP-6 | 5.2         | 148        | 0.158 | 45.8    |
| MCNP-7 | 6.1         | 145        | 0.151 | 56.2    |
| MCNP-8 | 7.0         | 146        | 0.150 | 60.7    |
